# 1 **The immune receptor SNCI monitors helper NLRs** 2 **targeted by a bacterial effector**

3 Ming-Yu Wang<sup>1,7</sup>, Jun-Bin Chen<sup>1,7</sup>, Rui Wu<sup>2,6,7</sup>, Hai-Long Guo<sup>4,7</sup>, Yan Chen<sup>1</sup>, Zhen-Ju Li<sup>1</sup>, Lu-Yang Wei<sup>1</sup>,  
4 Chuang Liu<sup>1</sup>, Sheng-Feng He<sup>1</sup>, Mei-Da Du<sup>1</sup>, Ya-long Guo<sup>5</sup>, You-Liang Peng<sup>4</sup>, Jonathan DG Jones<sup>3</sup>, Detlef  
5 Weigel<sup>2</sup>, Jian-Hua Huang<sup>3\*</sup>, Wang-Sheng Zhu<sup>1\*</sup>

6 <sup>1</sup>Key Laboratory of Surveillance and Management for Plant Quarantine Pests, Ministry of Agriculture and  
7 Rural Affairs, and College of Plant Protection, China Agricultural University, Beijing 100193 China

8 <sup>2</sup>Department of Molecular Biology, Max Planck Institute for Biology Tübingen, 72076 Tübingen, Germany

9 <sup>3</sup>The Sainsbury Laboratory, University of East Anglia, Norwich Research Park, Norwich NR4 7UH, UK

10 <sup>4</sup>Key Laboratory of Pest Monitoring and Green Management, Ministry of Agriculture and Rural Affairs,  
11 and College of Plant Protection, China Agricultural University, Beijing 100193 China

12 <sup>5</sup>State Key Laboratory of Systematic and Evolutionary Botany, Institute of Botany, Chinese Academy of  
13 Sciences, Beijing 100093 China

14 Current addresses:

15 <sup>6</sup>Department of Plant & Environmental Studies, Copenhagen University, 1871 Frederiksberg, Denmark

16 <sup>7</sup>These authors contributed equally

17 \*Correspondence: [wangshengzhu@cau.edu.cn](mailto:wangshengzhu@cau.edu.cn) (W.Z.) and [jianhua.huang@tsl.ac.uk](mailto:jianhua.huang@tsl.ac.uk) (J.H.)

## 18 **SUMMARY**

19 Plants deploy intracellular receptors to counteract pathogen effectors that suppress cell-surface  
20 receptor-mediated immunity. To what extent pathogens manipulate also immunity mediated by  
21 intracellular receptors, and how plants tackle such manipulation, remains unknown. *Arabidopsis*  
22 *thaliana* encodes three very similar ADRI class helper NLRs (ADRI, ADRI-L1 and ADRI-L2),  
23 which play key roles in plant immunity initiated by intracellular receptors. Here, we report that  
24 *Pseudomonas syringae* AvrPtoB, an effector with E3 ligase activity, can suppress ADRI-L1- and  
25 ADRI-L2-mediated cell death. ADRI, however, evades such suppression by diversification of two  
26 ubiquitination sites targeted by AvrPtoB. The intracellular sensor NLR SNCI interacts with and  
27 guards the CC<sub>R</sub> domains of ADRI-L1 and ADRI-L2. Removal of ADRI-L1 and ADRI-L2 or  
28 delivery of AvrPtoB activates SNCI, which then signals through ADRI to trigger immunity. Our  
29 work not only uncovers the long sought-after physiological function of SNCI in pathogen defense,  
30 but also that reveals how plants can use dual strategies, sequence diversification and a multiple  
31 layered guard-guardee system, to counteract pathogen attack on core immunity functions.

## 32 INTRODUCTION

33 Plants are constantly threatened by pathogens. To impede pathogen invasion, plants deploy  
34 plasma membrane-localized pattern-recognition receptors (PRRs) that initiate pattern-triggered  
35 immunity (PTI) upon detection of conserved molecular patterns diagnostic of pathogens. To  
36 enable successful invasion, pathogens in turn deliver effectors into plant cells to manipulate  
37 components of PTI. To antagonize the action of effectors, plants evolved intracellular nucleotide-  
38 binding domain leucine-rich repeat receptors (NLRs), which detect effectors or their effects on  
39 host proteins. The outcome is an enhanced immune response known as effector-triggered  
40 immunity (ETI). ETI usually culminates in programmed cell death called hypersensitive response  
41 (HR), a hallmark of ETI<sup>1,2</sup>. Recent studies have revealed at the molecular level how PTI and ETI  
42 are interlinked, with PTI and ETI potentiating each other<sup>3-6</sup>.

43 NLRs are classified into TIR-NLRs (TNLs), CC-NLRs (CNLs), and CC<sub>R</sub>-NLRs (RNLs), based on  
44 their N termini. RNLs are considered to function as helper NLRs downstream of sensor NLRs  
45 including most TNLs and some CNLs, which can directly or indirectly recognize effectors. Helper  
46 NLRs are encoded by three gene families, each with a different founding member: *ADR1*  
47 (*ACTIVATED DISEASE RESISTANCE 1*), *NRG1* (*N Requirement Gene 1*), and *NRC* (NLR Protein  
48 Required For Hypersensitive-response-associated Cell Death). *ADR1* homologs are ubiquitously  
49 present in angiosperm genomes, while the *NRG1* and *NRC* families are limited to dicots and  
50 Solanaceae, respectively<sup>7</sup>. The *Arabidopsis thaliana* genome encodes three unequally members of  
51 the *ADR1* family: including *ADR1*, *ADR1-L1* and *ADR1-L2*<sup>7</sup>. Like activated *ZAR1* and *Sr35* as well  
52 as *NRG1*, autoactive *ADR1* can form Ca<sup>2+</sup>-permeable influx channels that activate cell death<sup>8-10</sup>.  
53 In addition, *ADR1*s form complexes with *EDSI* (*ENHANCED DISEASE SUSCEPTIBILITY 1*)-  
54 *PAD4* (*PHYTOALEXIN DEFICIENT 4*) heterodimers<sup>3,11</sup>. Similar to the *eds1* mutant, *adr1 adr1-*  
55 *L1 adr1-L2* triple mutants are highly susceptible to virulent *Pseudomonas syringae* as well as  
56 avirulent pathogens, resistance to which relies primarily on TNLs, but also some CNLs<sup>12,13</sup>. *EDSI-*  
57 *PAD4-ADR1* complexes are also required for full PTI responses triggered by elicitor *nlp20*<sup>3,6</sup>.  
58 Taken together, these findings suggest that *ADR1*s play a key role in ETI and PTI.

59 *SNCI* (*SUPPRESSOR OF NPR1-1, CONSTITUTIVE 1*) encodes an extensively studied canonical  
60 sensor TNL<sup>14</sup>. Overexpression of wild-type *SNCI* activates salicylic acid (SA)-dependent defense

61 responses<sup>15</sup>, and gain-of-function mutations in the coding sequence can suppress disease  
62 susceptibility of *npr1-1* mutants, which are defective in systemic acquired resistance (SAR)<sup>14,16</sup>.  
63 Subsequent studies on SNCI uncovered complex control of NLRs, including epigenetic regulation,  
64 alternative splicing, intracellular trafficking, post-translational modification, and structural  
65 variation at SNCI itself<sup>17,18</sup>. Inactivation of SNCI restores elevated disease resistance seen in a  
66 range of autoimmune mutants with defects in very different types of genes<sup>17</sup>. Remarkably, even  
67 though SNCI has become a powerful model to understand many different aspects of NLR  
68 regulation, its physiological roles in plant immunity, if any, have remained elusive.

69 An important role of pathogen effectors is to antagonize PTI components, with some Type III  
70 Secretion System (T3SS) effectors of *P. syringae* also suppressing ETI<sup>19-21</sup>. For example, HopII  
71 greatly dampens HR triggered by several other effectors by unknown mechanisms<sup>21</sup>. A recent  
72 reverse genetic screen identified five effectors from oomycetes and nematodes that suppress cell  
73 death triggered by NLRs Prf or Rpi-blb2 in *N. benthamiana*<sup>22</sup>. Among these effectors, SS15 exerts  
74 its effects by inhibiting the intramolecular rearrangements of NRC2, which prevents its  
75 oligomerization and activation<sup>23</sup>, while AVRcapIb dampens NRC2 and NRC3 function through  
76 the membrane trafficking-associated protein NbTOL9a (Target of Myb I-like protein 9a)<sup>22</sup>. From  
77 these studies it is clear that much is still to be learned about how pathogens suppress ETI and  
78 how plants in turn counteract such suppression.

79 Here, we report that the *P. syringae* effector AvrPtoB, an E3 ligase induces SNCI oligomerization  
80 by ubiquitinating and promoting degradation of the *A. thaliana* helper NLR ADRI-L1. Two non-  
81 synonymous substitutions in the CC<sub>R</sub> domain allow the ADRI-L1 homolog ADRI to evade  
82 AvrPtoB-mediated ubiquitination. ADRI-L1 itself is guarded by the sensor NLR SNCI. The  
83 autoimmunity of *adri-L1-1* single and *adri-L1-1 adri-L2* double mutants is suppressed by  
84 inactivation of *ADRI*, indicating that ADRI acts downstream of ADRI-L1 and ADRI-L2. Together,  
85 we demonstrate that the sensor NLR SNCI recognises AvrPtoB by guarding ADRI-L1 and  
86 ADRI-L2, then signals through ADRI for immune responses. Our findings uncover a plant  
87 mechanism for counteracting ETI suppression by bacterial effectors, illustrating yet another layer  
88 of plants neutralizing pathogen effectors.

## 89 RESULTS

### 90 AvrPtoB induces ADRI-LI protein degradation

91 We use *Pseudomonas syringae* (*Pst*) pv. tomato DC3000 model to study the interaction between  
92 the plant immune system and pathogen effectors. To identify *Pst* DC3000 effectors that suppress  
93 the activity of the essential ETI component ADRI-LI from *A. thaliana* (hereafter Arabidopsis), we  
94 first generated an autoactive ADRI-LI variant (ADRI-LI<sup>D489V</sup>), which triggers robust cell death  
95 in *N. benthamiana* (**Extended Data Fig. 1a**). We co-expressed this variant, with a mutation in  
96 the MHD regulatory motif, in individual combinations with 31 of the 36 *Pst* DC3000 effectors in  
97 *N. benthamiana* in search for effectors that might dampen ADRI-LI<sup>D489V</sup>-triggered cell death (**Fig.**  
98 **1a**). Only AvrPtoB did so completely (**Fig. 1b, Extended Data Fig. 1b**).

99 AvrPtoB is a U-box E3 ligase<sup>24</sup>. The E3 ligase-dead variant AvrPtoB<sup>F173A/F479A</sup> (ref. 24) did not  
100 suppress ADRI-LI<sup>D489V</sup>-triggered cell death (**Fig. 1b**), indicating that AvrPtoB uses its E3 ligase  
101 activity to manipulate ADRI-LI function. Levels of ADRI-LI-FLAG protein in *N. benthamiana*  
102 leaves were substantially reduced when co-expressed with AvrPtoB-HA, but not when co-  
103 expressed with the catalytically inactive AvrPtoB<sup>F173A/F479A</sup> variant (**Fig. 1c**). Such reduction was  
104 alleviated in the presence of the 26S proteasome inhibitor MG132, but not in the presence of  
105 BAF, which inhibits protein degradation by the autophagy pathway (**Fig. 1d**). These results  
106 suggest that AvrPtoB triggers ADRI-LI degradation in an E3 ligase activity-dependent manner via  
107 the 26S proteasome pathway.

108 To further confirm the degradation of ADRI-LI catalysed by AvrPtoB, wild-type and catalytically  
109 inactive variants were delivered by the effectorless *Pst* DC3000D 36E strain<sup>19</sup> into Arabidopsis  
110 ADRI-LI-FLAG-TurboID plants. ADRI-LI-FLAG-TurboID protein levels had increased at 3  
111 hours post infiltration (hpi) for all treatments (**Fig. 1e**), likely due to activation of PTI by *Pst*  
112 DC3000 D36E. ADRI-LI-FLAG-TurboID protein level had levelled off at 6 hpi when plants were  
113 infiltrated with *Pst* DC3000 D36E expressing AvrPtoB, and decreasing further at 12 hpi (**Fig. 1e**).  
114 In contrast, no changes in ADRI-LI-FLAG-TurboID protein level were observed at 6 and 12 hpi  
115 when plants were infiltrated with *Pst* DC3000 D36E expressing AvrPtoB<sup>F173A/F479A</sup> (**Fig. 1e**). Taken  
116 together, these observations suggest that AvrPtoB induces the degradation of ADRI-LI in  
117 Arabidopsis during pathogen infection.

118 **Fig. 1. AvrPtoB suppresses ADRI-L1-**  
 119 **triggered HR and induces the**  
 120 **degradation of ADRI-L1. a,** Schematic  
 121 diagram of the screen of *Pst* DC3000 effectors  
 122 that suppress HR triggered by transient  
 123 expression of ADRI-L1<sup>D489V</sup> in *N.*  
 124 *benthamiana*. **b,** E3 ligase activity of AvrPtoB  
 125 is required for suppression of HR triggered by  
 126 ADRI-L1<sup>D489V</sup>. Numbers on the far right  
 127 indicate leaves showing obvious HR over all  
 128 infiltrated leaves. **c,** E3 ligase activity is  
 129 required for AvrPtoB inducing degradation of  
 130 ADRI-L1. **d,** The 26S proteasome inhibitor  
 131 MG132 blocks degradation of ADRI-L1  
 132 induced by AvrPtoB. **e,** AvrPtoB induces  
 133 degradation of ADRI-L1-FLAG-Turboid in  
 134 four-week-old transgenic Arabidopsis plants.  
 135 Numbers indicate arbitrary densitometry  
 136 units of corresponding bands after  
 137 normalization to the left-most ADRI-L1-  
 138 FLAG-Turboid band of each immunoblot.  
 139 Experiments were performed three times,  
 140 with similar results.

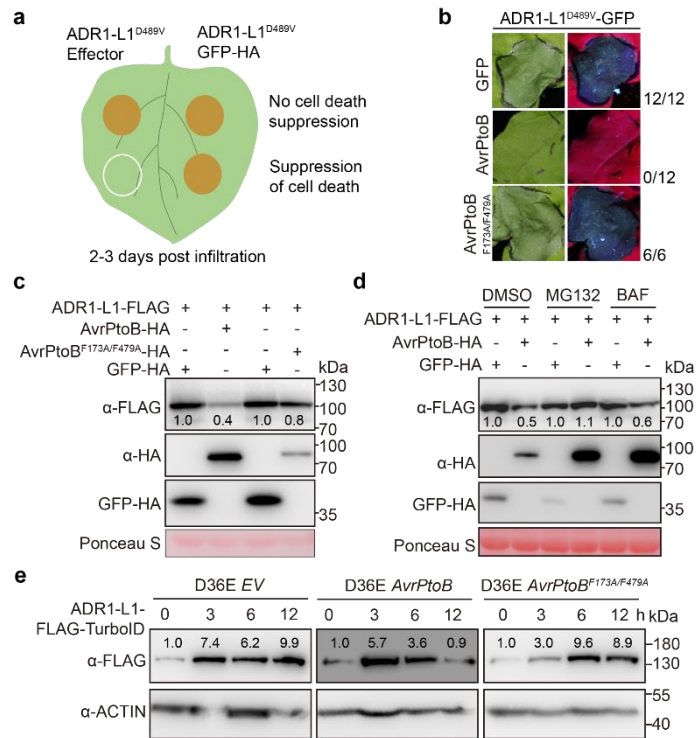

## 141 The CC<sub>R</sub> domain determines AvrPtoB targeting

142 Since the three ADRI members share similar functions in regulating intracellular receptor-  
 143 dependent immune responses, we wondered whether AvrPtoB also compromised the stability  
 144 of ADRI and ADRI-L2 as well as the ability of their autoactive variants to trigger HR. In contrast  
 145 to ADRI-L1<sup>D489V</sup>, HR triggered by ADRI<sup>D461V</sup> was only rarely suppressed, and HR triggered by  
 146 ADRI-L2<sup>D484V</sup> was only slightly suppressed by AvrPtoB (**Fig. 2a**), even though the co-  
 147 immunoprecipitation (Co-IP) and split-luciferase complementation (SLC) had indicated that  
 148 AvrPtoB can interact with all ADRI members (**Fig. 2b, Extended Data Fig 2a, b**). In  
 149 agreement, ADRI protein levels in *N. benthamiana* were not affected by AvrPtoB (**Extended**  
 150 **Data Fig 2c**). The weak effects on ADRI-L2 protein abundance may be due to the mild  
 151 suppression of ADRI-L2 by AvrPtoB, which is consistent with the modest impairment of ADRI-  
 152 L2<sup>D484V</sup>-mediated cell death by AvrPtoB (**Fig. 2a, Extended Data Fig. 2c**). Furthermore,  
 153 infiltration of *Pst* DC3000 D36E carrying AvrPtoB did not alter the protein level of either ADRI-  
 154 FLAG-Turboid or ADRI-L2-Flag-Turboid in Arabidopsis (**Extended Data Fig. 2d**). These

155 results suggest that AvrPtoB affects the stability of ADRI family members as well as the HR they  
156 trigger in a homolog-specific manner.

157 To identify the causal domains responsible for differential suppression of ADRI- and ADRI-LI-  
158 triggered HR by AvrPtoB, we swapped the CC<sub>R</sub>, NB-ARC, and LRR domains between ADRI-  
159 LI<sup>D489V</sup> and ADRI<sup>D461V</sup>. Interchange of the CC<sub>R</sub> domain, but not the NB-ARC and LRR domains,  
160 made ADRI<sup>D461V</sup>-triggered cell death responsive to AvrPtoB, and at the same time made ADRI-  
161 LI<sup>D489V</sup>-triggered cell death insensitive to AvrPtoB (**Fig. 2c**). In agreement, ADRI<sup>D461V</sup> with the  
162 CC<sub>R</sub><sup>ADRI-LI</sup> domain, but not with the NB-ARC<sup>ADRI-LI</sup> or LRR<sup>ADRI-LI</sup> domains, accumulated to a lower  
163 level in the presence of AvrPtoB, while the levels of ADRI-LI<sup>D489V</sup> with the CC<sub>R</sub><sup>ADRI</sup> domain were  
164 insensitive to the presence of AvrPtoB (**Fig. 2d**). These results indicate that the CC<sub>R</sub> domain  
165 determines the specificity of AvrPtoB-mediated suppression of ADRI-LI activity.

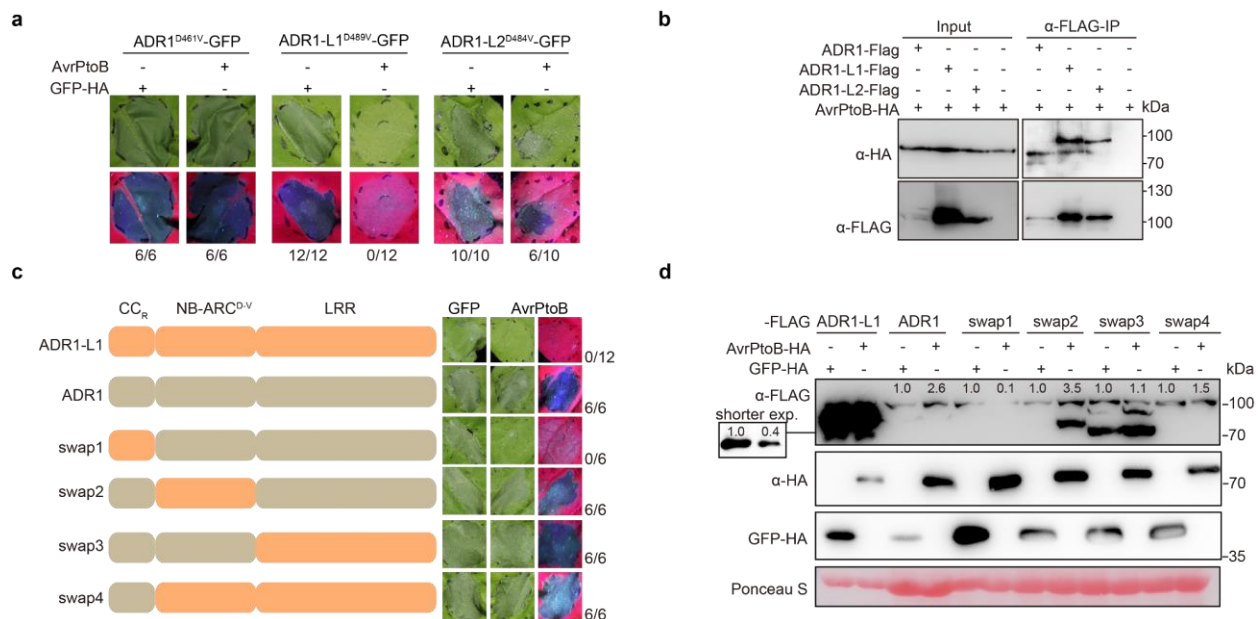

166 **Fig. 2. The CC<sub>R</sub> domains are responsible for the differential AvrPtoB suppression of ADRI**  
167 **and ADRI-LI activity.** **a**, AvrPtoB differentially suppresses HR triggered by autoactivate ADRI-LI  
168 homologs. ADRI<sup>D461V</sup>, ADRI-LI<sup>D489V</sup>, and ADRI-L2<sup>D484V</sup> were transiently co-expressed with GFP-HA and  
169 AvrPtoB-HA in *N. benthamiana*. **b**, AvrPtoB associates with the three ADRI homologs, as shown by Co-  
170 IP in *N. benthamiana*. **c**, Domain swapping shows that the CC<sub>R</sub> domains of ADRI homologs determine  
171 susceptibility to AvrPtoB suppression. **d**, Swapping the CC<sub>R</sub> domains between ADRI and ADRI-LI  
172 switches the AvrPtoB-susceptibility of ADRI and ADRI-LI. Numbers on the bottom (**a**) or far right (**c**)  
173 indicate leaves with HR over all infiltrated leaves. Experiments were performed three times, with similar  
174 results.



175 As sequence differences in the  $CC_R$  domains are responsible for differential effects of AvrPtoB  
176 on ADRI homologs, we tested whether AvrPtoB can inhibit also the cell death caused by  
177 transient expression of only the  $CC_R$  domain of ADRI homologs in *N. benthamiana*<sup>10,25</sup>. Similar to  
178 AvrPtoB effects on the autoactive full-length variants, AvrPtoB did not affect  $CC_R^{ADRI}$ -triggered  
179 cell death, slightly suppressed  $CC_R^{ADRI-L2}$ -triggered cell death, and abolished  $CC_R^{ADRI-LI}$ -triggered  
180 cell death (**Fig. 3a**). This was paralleled by AvrPtoB having little impact on the protein levels of  
181  $CC_R^{ADRI}$  and  $CC_R^{ADRI-L2}$ , but causing a substantial reduction of  $CC_R^{ADRI-LI}$  levels (**Extended Data**  
182 **Fig. 3a**). Thus, the effects of AvrPtoB on both protein accumulation and cell death-inducing  
183 ability are similar between the  $CC_R$  domains and full-length ADRI homologs (**Fig. 2b, 3a,**  
184 **Extended Data Fig. 2d, 3a**).

185 Because the MBP-tagged  $CC_R$  domains of all three ADRI homologs were similarly pulled down  
186 by purified AvrPtoB-GST, interaction of AvrPtoB with  $CC_R$  domains (**Fig. 3b**) is apparently not  
187 sufficient for AvrPtoB to promote protein degradation (**Extended Data Fig. 3a**), likely due to  
188 differential ubiquitination of  $CC_R^{ADRI}$  and  $CC_R^{ADRI-LI}$  by AvrPtoB. An in vitro assay confirmed that  
189 AvrPtoB can efficiently ubiquitinate  $CC_R^{ADRI-LI}$  and  $CC_R^{ADRI-L2}$  but not  $CC_R^{ADRI}$  (**Fig. 3c**). This is  
190 consistent with AvrPtoB being able to at least partially suppress cell death triggered by  $CC_R^{ADRI-LI}$   
191 and  $CC_R^{ADRI-L2}$ , and  $CC_R^{ADRI}$  being immune to AvrPtoB. Our results indicate that  $CC_R^{ADRI}$   
192 escapes suppression of AvrPtoB by evading AvrPtoB-catalysed ubiquitination.

193 To identify the residues that allow  $CC_R^{ADRI}$  to avoid becoming ubiquitinated, we generated  
194 chimeric  $CC_R$  proteins by swapping the first 50 amino acids between  $CC_R^{ADRI-LI}$  and  $CC_R^{ADRI}$ , then  
195 co-expressed the chimeric  $CC_R$  proteins with AvrPtoB in *N. benthamiana* (**Extended Data Fig.**  
196 **3b, c**). While AvrPtoB failed to suppress cell death triggered by wild-type  $CC_R^{ADRI}$ , it abolished  
197 the cell death caused by the  $CC_R^{ADRI}$  chimera with the first 50 amino acids of  $CC_R^{ADRI-LI}$   
198 (**Extended Data Fig. 3d**).

199 Canonical ubiquitination occurs on lysine residues. The first 50 amino acids of ADRI-LI contain  
200 only two lysines, K34 and K48, that are conserved in ADRI-L2. The  $CC_R$  domain from ADRI  
201 instead features a glutamate (E35) and an arginine (R49) in these two positions (**Extended Data**  
202 **Fig. 3b**). The E35 and R49 residues may enable ADRI to evade being targeted by AvrPtoB. To  
203 test this hypothesis, we mutated E35 and R49 of the  $CC_R^{ADRI}$  to lysine (E35K and R49K) and



204 examined the effects of the two mutations on AvrPtoB susceptibility. When both E35K and R49K  
205 were introduced, cell death triggered by  $CC_R^{ADRI}$  was dramatically inhibited by AvrPtoB (**Fig. 3d**,  
206 **Extended Data Fig. 3d**). As expected,  $CC_R^{ADRI}$  with E35K/R49K substitutions was  
207 ubiquitinated by AvrPtoB (**Fig. 3e**). We also introduced these changes in the context of the full-  
208 length ADRI<sup>D461V</sup> gain-of-function variant, which became susceptible to suppression by AvrPtoB  
209 as well (**Fig. 3f, Extended Data Fig. 3e**). Conversely, when K34 and K48 of ADRI-LI<sup>D489V</sup>  
210 were mutated to glutamate and arginine, ADRI-LI<sup>D489V</sup>-triggered cell death could no longer be  
211 suppressed by AvrPtoB (**Fig. 3f, Extended Data Fig. 3e**). Taken together, our results indicate  
212 that the K34 and K48 residues are the functionally relevant sites in the  $CC_R$  domain of ADRI-LI  
213 that are ubiquitinated by AvrPtoB. Because ADRI features different residues in these positions,  
214 E35 and R49, it evades suppression of its activity by AvrPtoB.

215 To understand the evolutionary history of changes at the  $CC_R$  residues crucial for targeting by  
216 AvrPtoB, we reconstructed the phylogeny of 552 ADRI homologs from angiosperms. The 117  
217 Brassicaceae homologs form a single clade, indicating that diversification occurred only in the  
218 Brassicaceae, with the ADRI clade apparently being younger than the ADRI-LI clade (**Extended**  
219 **Data Fig. 3f**). Focusing on the two lysine residues targeted by AvrPtoB, we find that an  
220 ADRI/ADRI-LI/ADRI-L2 homolog from the sister lineage of Brassicaceae *Tarenaya hassleriana*  
221 at the base of the Brassicales encodes a lysine corresponding to position 48 in ADRI-LI, but not  
222 at position 34. In the Brassicaceae, the ADRI-LI and ADRI-L2 homologs show similar profiles, with  
223 lysine being the most common residue at position 46/48, while lysine is found in that position  
224 only in a minority of ADRI homologs. At position 32/34, several ADRI-LI/L2 homologs have a  
225 lysine, but lysine is never found at that position in ADRI (**Extended Data Fig. 3g**). Notably,  
226 lysines at these two positions are exceedingly rare in ADRI homologs outside of the Brassicaceae,  
227 suggesting an unknown trade-off that led to the evolution of lysines at these positions in the  
228 Brassicaceae, despite these residues being targets of AvrPtoB.

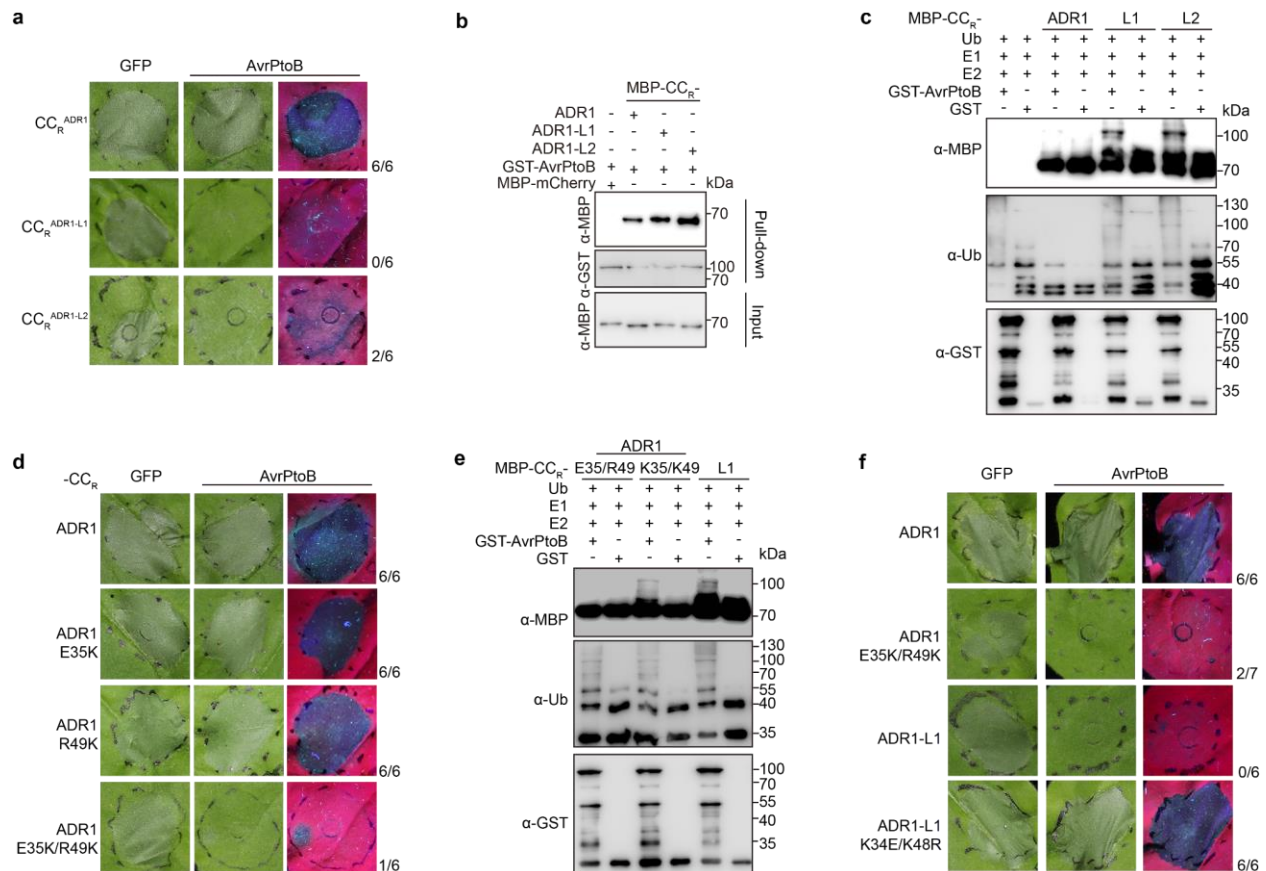

229 **Fig. 3. Two lysine residues in the CC<sub>R</sub> domain are required for AvrPtoB-dependent**  
 230 **suppression of ADR1-LI<sup>D489V</sup> activity.** **a**, AvrPtoB fully and partially suppresses HR triggered by  
 231 CC<sub>R</sub><sup>ADR1-LI</sup> and CC<sub>R</sub><sup>ADR1-L2</sup>, but not at all HR triggered by CC<sub>R</sub><sup>ADR1</sup> in *N. benthamiana*. **b**, AvrPtoB associates  
 232 with the CC<sub>R</sub> domains of the three ADR1 homologs *in vitro*, as shown by pull-down assays with proteins  
 233 purified from *E. coli*. **c**, AvrPtoB ubiquitinates CC<sub>R</sub><sup>ADR1-LI</sup> and CC<sub>R</sub><sup>ADR1-L2</sup>, but not CC<sub>R</sub><sup>ADR1</sup>, as shown by *in*  
 234 *vitro* ubiquitination assay with proteins purified from *E. coli*. **d**, AvrPtoB suppresses HR triggered by the  
 235 E35K/R49K mutations in *N. benthamiana*. **e**, AvrPtoB ubiquitinates CC<sub>R</sub><sup>ADR1</sup> with E35K/R49K but not wild-  
 236 type CC<sub>R</sub><sup>ADR1</sup>, as shown by *in vitro* ubiquitination with proteins purified from *E. coli*. **f**, AvrPtoB suppresses  
 237 HR triggered by full-length ADR1<sup>D461V</sup> with E35K/R49K mutations in *N. benthamiana*. Conversely, AvrPtoB  
 238 no longer suppresses HR triggered by ADR1-LI<sup>D489V</sup> upon introduction of the K34E/K48R mutations.  
 239 Numbers on the right (**a**, **d**, and **f**) indicate leaves with HR over all infiltrated leaves tested. Experiments  
 240 were performed three times, with similar results.

### 241 ***adr1-LI* null mutants express constitutive immunity**

242 The *adr1-LI-1* mutant, reported to carry a T-DNA insertion disrupting the first exon of *ADR1-LI*,  
 243 was used in previous studies to characterize the effects of *ADR1-LI* knockout on plant immunity,  
 244 with the conclusion that the mutant on its own has no major phenotypes<sup>26,27</sup>, although *adr1-LI-1*  
 245 as well as two EMS-induced point mutations in *ADR1-LI*, *muse15-1* and *muse15-2*, enhance *sncl*  
 246 gain-of-function autoimmune defects<sup>27</sup>. To confirm that *adr1-LI-1* is a knockout allele, we used an  
 247 amplicon that spans the first and second exon of *ADR1-LI* to quantify mRNA expression in RT-

248 qPCR assays. We found that the T-DNA mutant still expressed about 30% of the amount of  
 249 *ADR1-L1* mRNA observed in wild type (**Extended Data Fig. 4a, b**), indicating that *adr1-L1-1* is  
 250 only a knockdown allele.

251 We generated a null mutant of *ADR1-L1*, *adr1-L1-c1*, by deleting the full coding region of *ADR1-L1*  
 252 through CRISPR/Cas9 gene editing (**Fig. 4a**). No *ADR1-L1* expression was detected in the mutant  
 253 by RT-qPCR (**Extended Data Fig. 4c**). Surprisingly, the *adr1-L1-c1* mutant was stunted and had  
 254 curly leaves (**Fig. 4a**), two hallmarks of autoimmunity in Arabidopsis<sup>28</sup>. To exclude the possibility  
 255 that the phenotypes of *adr1-L1-c1* mutant were due to off-target effects of the CRISPR/Cas9  
 256 system, we transformed *ADR1-L1* driven by its native promoter into *adr1-L1-c1* mutants. Dwarfing  
 257 and leaf curling were rescued in the *adr1-L1-c1* complementation lines (**Fig. 4a**), confirming that  
 258 the observed phenotypes are due to knockout of *ADR1-L1*. Three additional independent *adr1-*  
 259 *L1* CRISPR/Cas9 mutants (*adr1-L1-c2*, *adr1-L1-c3*, *adr1-L1-c4*), which had either a small inversion  
 260 or small deletions in the region encoding the CC<sub>R</sub> domain, were also stunted in size and had curly  
 261 leaves, mimicking the *adr1-L1-c1* mutants (**Fig. 4a**).

262 **Fig. 4. Inactivation of *ADR1-L1* causes autoimmunity.**

263 **a**, Left, four independent *adr1-L1* null mutants generated by CRISPR/Cas9 have typical autoimmune  
 264 phenotypes, which are rescued by a genomic *ADR1-L1* copy (“g*ADR1-L1*”). Right: diagram of  
 265 T-DNA insertion in *adr1-L1-1*, the region targeted by guideRNAs (gRNAs) for  
 266 CRISPR/Cas9-mediated inactivation, and the resultant *adr1-L1* null alleles. Scale bar: 10 mm.  
 267 **b**, *PR1* expression is increased in *adr1-L1* mutants. *PR1* expression in plants in (**a**) was  
 268 quantified by RT-qPCR. **c**, *adr1-L1* mutants have enhanced resistance to *Pst* DC3000  
 269 infection. **d**, The T-DNA mutant line *SAIL\_302\_C06* is a partial loss-of-function  
 270 allele of *ADR1-L1*. Four-week-old plants are shown. Scale bar: 10 mm. **e**, *PR1* expression  
 271 is also increased in the *adr1-L1-c5* mutant generated in the *adr1-L1-1* background. *PR1*  
 272 expression in plants shown in (**d**) was quantified by RT-qPCR assays. Data in (**b**, **c**,  
 273 **e**) represent the mean and standard error (n = 3, 5, and 3 biologically independent samples  
 274 for (**b**), (**c**), and (**e**), respectively. *p* < 0.05, one-way ANOVA followed by Tukey’s post hoc test, letters  
 275 indicate significantly different groups).

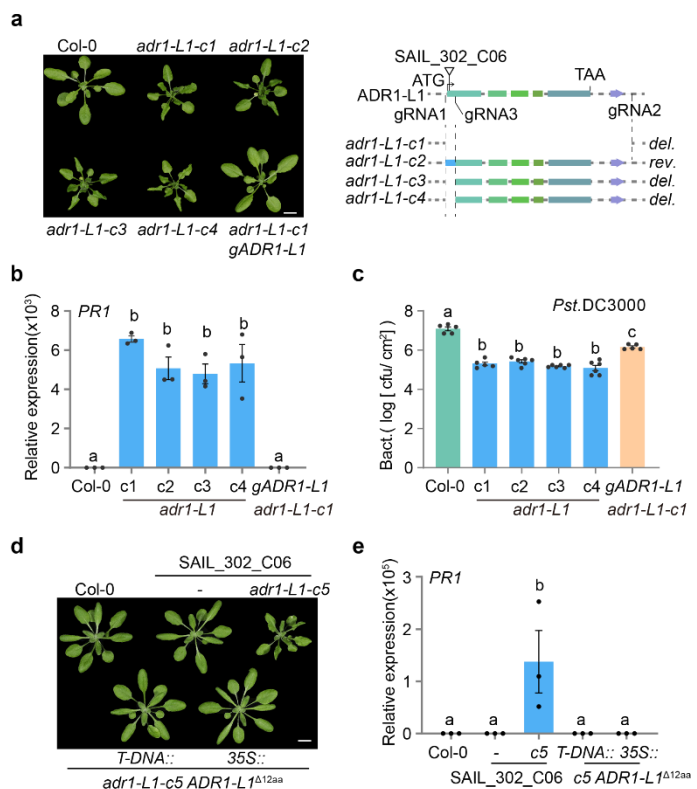

288 We next quantified expression of the defense marker gene *PR1* to determine whether the  
289 phenotypes of the new *adr1-L1* mutants were indeed due to autoimmunity. *PR1* expression was  
290 increased in all four new *adr1-L1* mutants (**Fig. 4b**), and this increase was reversed in the *adr1-*  
291 *L1-cl* complementation lines. In accordance, growth of the bacterial pathogen *Pst* DC3000 was  
292 impaired in the four new *adr1-L1* mutants, and this mutant phenotype was again rescued in the  
293 *adr1-L1-cl* complementation lines (**Fig. 4c**). To confirm that the absence of reported phenotypes  
294 for the previously reported T-DNA allele<sup>26,27</sup> did not result from differences in growth conditions,  
295 we grew it alongside the new *adr1-L1-cl* mutant, confirming that only the T-DNA knockdown  
296 allele appeared normal (**Extended Data Fig. 4d**). Collectively, these results demonstrate that  
297 a complete knock out of *ADR1-L1* leads to spontaneous activation of immune signaling.

298 To investigate further why the T-DNA insertion in *adr1-L1-l* T-DNA causes only partial loss of  
299 function, we carried out further RT-PCR analyses, which showed that this allele produces a 5'  
300 truncated transcript, with the T-DNA fragment providing a new start codon that should produce  
301 a nearly-full-length protein lacking only amino acids 2 to 13 (*ADR1-L1*<sup>Δ12aa</sup>) (**Extended Data Fig.**  
302 **4b-f**). Deleting *ADR1-L1* including the inserted T-DNA using CRISPR/Cas9 led to dwarfism and  
303 elevated *PR1* expression, which was rescued when the plants were transformed with a construct  
304 containing *ADR1-L1*<sup>Δ12aa</sup> driven by the 3' region of the T-DNA or the CaMV35S promoter (**Fig.**  
305 **4d, e**). These results confirm that *adr1-L1-l* is only a partial loss-of-function allele that does not  
306 cause autoimmunity.

### 307 ***adr1-L1* null mutant defects are *SNCI*-dependent**

308 The defense marker *PR1*, which is greatly increased in *adr1-L1* null mutants, is regulated by salicylic  
309 acid (SA), and SA signaling in turn is protected by *EDS1* and *PAD4*<sup>29</sup>. To begin to uncover the  
310 mechanism underlying the spontaneous activation of immunity in *adr1-L1* null mutants, we first  
311 crossed *adr1-L1-cl* mutants to plants deficient for the salicylic acid biosynthesis gene *SID2*  
312 (*SALICYLIC ACID INDUCTION DEFICIENT 2*) or for *PAD4* and *EDS1*. The morphological defects of  
313 *adr1-L1-cl* were partially suppressed by *sid2-2* and fully suppressed by *eds1-2* and *pad4-1*  
314 (**Extended Data Fig. 5a**).

315 Because autoimmunity often results from inappropriate activation of NLR activity, we speculated  
316 that the autoimmune phenotype of *adr1-L1* mutants might result from genetic interaction with  
317 other NLRs. To identify such NLR candidates, we exploited the extensive variation in NLR  
318 complements in different *Arabidopsis* accessions<sup>30</sup>, and deleted *ADR1-L1* in the *Arabidopsis*  
319 accessions Est-1, C24 and Ws-2. Different from Col-0 and C24, inactivation of *ADR1-L1* in Ws-2  
320 and Est-1 did not cause obvious morphological defects (**Fig. 5a**). An F<sub>2</sub> mapping population was  
321 generated by crossing *adr1-L1* (Ws-2) and *adr1-L1-cl* (Col-0). Genetic linkage analysis identified  
322 a single large-effect locus on chromosome 4 that suppressed *adr1-L1* autoimmune defects. Fine  
323 mapping narrowed the interval to a ~130 kb region from 9.47 Mb to 9.60 Mb on chromosome 4  
324 (**Extended Data Fig. 5b**), which encompasses the *RPP4* cluster of *TNL* genes.

325 The *RPP4* cluster includes the intensively studied *TNL* gene *SNCI*, which is functional in Col-0,  
326 but not in Ws-2<sup>31</sup>, one of the two accessions in which the *adr1-L1* knockout phenotype is  
327 suppressed. To test whether *SNCI* is a natural modifier of *adr1-L1*, we transformed the *SNCI*  
328 (Col-0) genomic fragment into the *adr1-L1* (Ws-2) mutant. The transgenic plants resembled the  
329 *adr1-L1-cl* mutant of the Col-0 accession (**Fig. 5a**). Furthermore, in Col-0, the *sncl-11* knockout  
330 allele suppressed morphological and molecular defects of *adr1-L1-cl* mutants (**Fig. 5b**,  
331 **Extended Data Fig. 5c-d**), confirming that *SNCI* is the natural modifier of *ADR1-L1*. Dwarfism  
332 of the *adr1-L1-cl/sncl-11* mutant was restored by introducing the wild-type *SNCI* genomic  
333 fragment but not its P-loop mutant *SNCI<sup>GK-AA</sup>* (**Fig. 5b**). These results together showed that the  
334 *adr1-L1-cl* mutant defects are mediated by *SNCI*, most likely through activation of *SNCI* signaling.

### 335 **SNCI guards ADRI-L1/L2 and signals through ADRI**

336 The genetic interaction of *SNCI* and *ADR1-L1* prompted us to test their physical interaction.  
337 *SNCI* was pulled down by all three ADRI homologs in Co-IP assays in *N. benthamiana* (**Fig. 5c**).  
338 In vitro pull-down experiments pointed to *SNCI* interacting, likely with different affinities, with  
339 the CC<sub>R</sub> domains of the three ADRI homologs (**Fig. 5d**).

340 Given the genetic and physical interaction between ADRI-L1 and *SNCI*, we hypothesized that  
341 *SNCI*, a sensor NLR, may guard ADRI-L1 through binding its CC<sub>R</sub> domain, with loss of ADRI-  
342 LI leading to *SNCI* activation, as seen with some other NLRs that directly guard cellular targets<sup>17</sup>.  
343 Transient expression of *SNCI* on its own triggered cell death in *N. benthamiana*, which could be



344 suppressed by co-expression of GFP-CC<sub>R</sub><sup>ADRI-L1</sup> but not GFP-CC<sub>R</sub><sup>ADRI</sup> and GFP-CC<sub>R</sub><sup>ADRI-L2</sup> (Fig. 5e,  
 345 Extended Data Fig. 5f). In Arabidopsis, overexpression of GFP-CC<sub>R</sub><sup>ADRI-L1</sup> completely suppressed  
 346 the phenotypes of *adr1-L1-c1* mutants (T<sub>1</sub> plants, n = 26). Overexpression of GFP-CC<sub>R</sub><sup>ADRI-L2</sup> could  
 347 sometimes partially suppress *adr1-L1-c1* phenotypes (7/28 T<sub>1</sub> plants), while GFP-CC<sub>R</sub><sup>ADRI</sup> was  
 348 ineffective (n = 56) (Fig. 5f, g). We conclude that through monitoring the presence of their CC<sub>R</sub>  
 349 domains, SNC I mainly guards ADRI-L1 and, to a lesser extent, ADRI-L2 but not ADRI. A minor  
 350 role of SNC I in guarding ADRI-L2 was further supported by the observation that the *adr1-L2*  
 351 mutation slightly enhanced the *adr1-L1-c1* phenotype (Fig. 5h, Extended Data Fig. 5h).

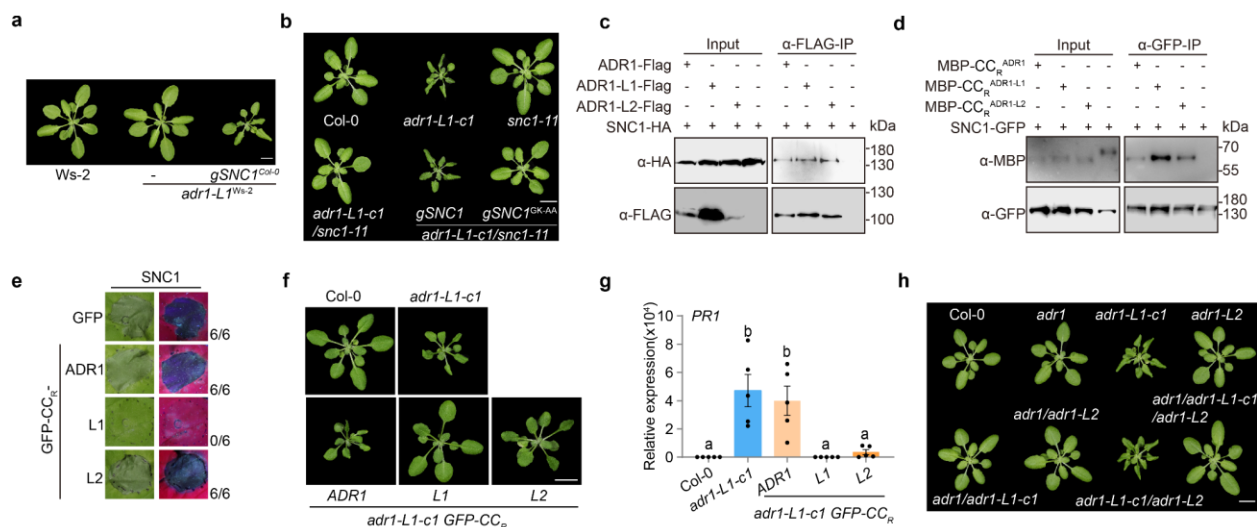

352 **Fig. 5. SNC I guards ADRI-L1 and ADRI-L2 and signals through ADRI.** **a**, The natural loss-of-  
 353 function *SNC1* allele in Ws-2 suppresses growth defects of *adr1-L1* null mutants in Ws-2. Four-week-old  
 354 plants of Ws-2, *adr1-L1<sup>Ws-2</sup>* and *adr1-L1<sup>Ws-2</sup>* transgenic line carrying an *SNC1* genomic fragment from Col-0.  
 355 Scale bar: 10 mm. **b**, The loss-of-function *snc1-11* allele suppresses growth defects of the *adr1-L1-c1* null  
 356 mutant in Col-0. This effect is reversed when a wild-type *SNC1* genomic fragment is introduced, but not  
 357 the mutant *SNC1<sup>GK-AA</sup>* variant. Scale bar: 10 mm. **c**, SNC I associates with the three ADRI homologs, as  
 358 shown by Co-IP assays in *N. benthamiana*. **d**, SNC I interacts with the CC<sub>R</sub> domains of the three ADRI  
 359 homologs, as shown by semi-*in vitro* pull-down assays. SNC I-GFP and MBP-CC<sub>R</sub> proteins were purified  
 360 from *N. benthamiana* and *E. coli*, respectively. **e**, The CC<sub>R</sub> domain of GFP-tagged ADRI-L1 efficiently  
 361 suppresses SNC I-triggered HR in *N. benthamiana*. Numbers on the right indicate leaves with HR over all  
 362 infiltrated leaves tested. **f**, Expression of GFP-tagged CC<sub>R</sub> domains of ADRI-L1 and ADRI-L2 but not  
 363 ADRI suppress the growth defects of *adr1-L1-c1*. Representative four-week-old Arabidopsis T<sub>1</sub> transgenic  
 364 plants with *p35S::GFP-CC<sub>R</sub><sup>ADRI</sup>*, *p35S::GFP-CC<sub>R</sub><sup>ADRI-L1</sup>* and *p35S::GFP-CC<sub>R</sub><sup>ADRI-L2</sup>* in *adr1-L1-c1*, grown in 23°C.  
 365 Scale bar, 10 mm. **g**, *PR1* expression of three-week old T<sub>1</sub> transformants shown in (f). Data represent the  
 366 mean and standard error of five independent T<sub>1</sub> transformants (n = 5 biologically independent samples,  
 367 *p* < 0.05, one-way ANOVA followed by Tukey's post hoc test; letters indicate significantly different groups).  
 368 **h**, Three-week-old *adr1-L1-c1* single and multiple mutants, grown at 23°C. Scale bar, 10 mm. Experiments  
 369 in (c-e) were performed three times, with similar results.

370 Phenotypic abnormalities in the *adr1-L1-cl* single and the *adr1-L1-cl/adr1-L2* double mutants were  
371 completely suppressed in the presence of the *adr1* mutation (**Fig. 5h**). Taken together, these  
372 results indicate that ADRI-L1 and ADRI-L2 are guardees of SNCI, which signals via ADRI to  
373 activate downstream responses.

#### 374 **SNCI recognises AvrPtoB through ADRI-L1**

375 Structural studies<sup>9,32-35</sup> have revealed how oligomerization of TNL proteins ROQ1 and RPP1, as  
376 well as CNL proteins ZARI and Sr35 is associated with their activation. We therefore used BN-  
377 PAGE to compare the behavior of 3xHA-tagged SNCI introduced into *sncl-11* and *adr1-L1-*  
378 *cl/sncl-11* plants. Upon inactivation of *ADRI-L1*, SNCI dramatically shifts to a slow-migrating  
379 species of 480-720 kDa, which likely corresponds to SNCI tetramers (**Fig. 6a**). We conclude  
380 that the loss of ADRI-L1 is sufficient to trigger the oligomerization of SNCI, with the SNCI  
381 oligomer constituting the active form.

382 Since ubiquitination of ADRI-L1 by AvrPtoB leads to its removal, akin to the situation in *adr1-L1-*  
383 *cl* mutants, we also examined whether AvrPtoB induced SNCI oligomerization. As shown in **Fig.**  
384 **6b**, infiltration of *Pst* DC3000 D36E expressing AvrPtoB induced a slow-migrating SNCI species  
385 of 480-720 kDa, similar to what had been observed in *adr1-L1-cl* mutants (**Fig. 6a**), confirming  
386 that SNCI acts as a guard for the AvrPtoB target ADRI-L1. Unexpectedly, infiltration of *Pst*  
387 DC3000 D36E carrying the E3 ligase dead AvrPtoB<sup>F173A/F479A</sup> also triggered a slow-migrating SNCI  
388 species of 480-720 kDa. Since both SNCI and AvrPtoB interact with the CC<sub>R</sub> domain of ADRI-L-  
389 LI, AvrPtoB<sup>F173A/F479A</sup> may compete with the binding of ADRI-L1 to SNCI, which would result in  
390 failure of ADRI-L1 to prevent oligomerization of SNCI. To test this hypothesis, ADRI-L1-GFP  
391 and SNCI-HA were co-expressed with AvrPtoB<sup>F173A/F479A</sup>-FLAG for Co-IP assays in *N.*  
392 *benthamiana*. In support of the proposed scenario, AvrPtoB<sup>F173A/F479A</sup> substantially reduced the  
393 ability of ADRI-L1 to pull down SNCI (**Fig. 6c**).

394 Overexpression of AvrPtoB induces dramatic autoimmunity in the Col-0 accession<sup>36</sup>, which we  
395 hypothesized could be due to loss of ADRI-L1 and concomitant activation of SNCI. Attempts  
396 to generate *35S::AvrPtoB-FLAG* transgenic lines for epistasis analysis with *SNCI* were not successful,  
397 likely due to extreme autoimmunity. As alternative, we measured expression of the defense  
398 marker *PR1* in Arabidopsis plants upon delivery of AvrPtoB or AvrPtoB<sup>F173A/F479A</sup> by DC3000 D36E.



399 As shown in **Fig. 6d**, *snc1-11* mutants expressed significantly less *PR1* than wild-type plants in  
 400 these trials. Moreover, the higher growth of *Pst* DC3000  $\Delta$ AvrPtoB in *snc1-11* mutants compared  
 401 to wild-type plants was dependent on AvrPtoB since no difference was seen between *snc1-11*  
 402 and wild-type plants infiltrated with *Pst* DC3000  $\Delta$ AvrPtoB  $\Delta$ AvrPtoB (**Fig. 6e**). We conclude that  
 403 the degradation of ADRI-LI initiated by AvrPtoB activates immune responses mediated by SNCI.

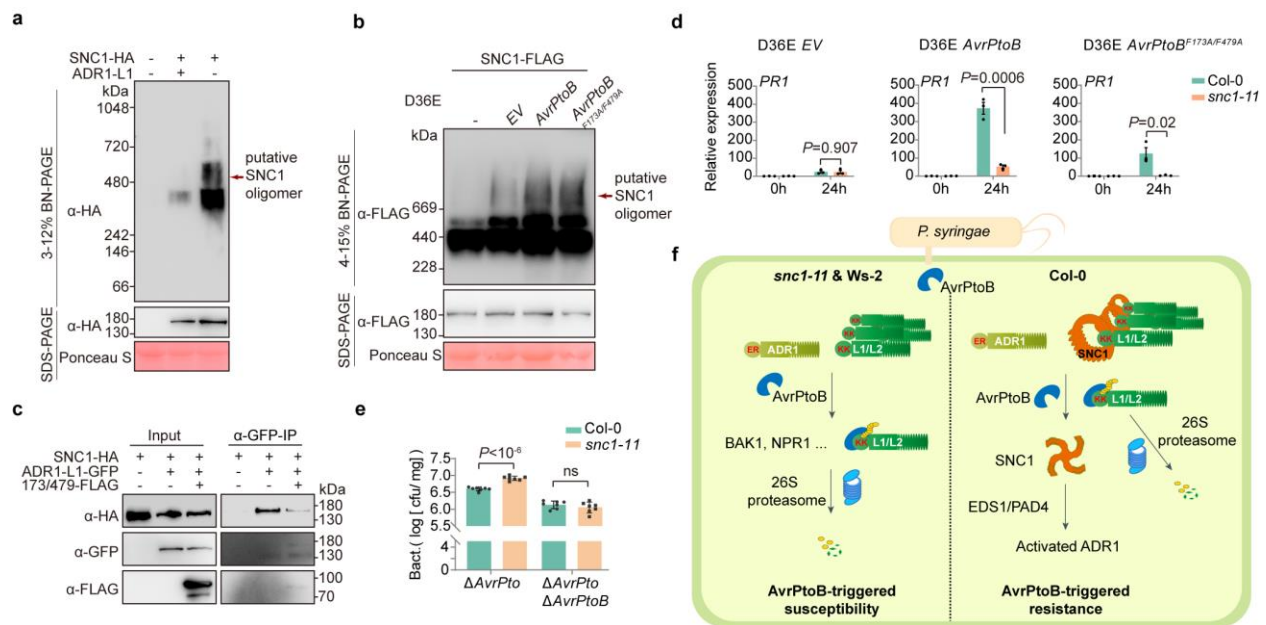

404 **Fig. 6. AvrPtoB induces oligomerization of SNCI and activates SNCI-dependent immune**  
 405 **responses.** **a**, Absence of ADRI-LI stimulates SNCI oligomerization in Arabidopsis, as shown by BN-  
 406 PAGE and SDS-PAGE. Arrow points to apparent higher-order SNCI complexes, likely SNCI tetramers.  
 407 **b**, AvrPtoB enhances SNCI oligomerization as shown by BN-PAGE and SDS-PAGE. Arrow points to  
 408 potential SNCI complexes. **c**, The E3 ligase dead variant AvrPtoB<sup>F173A/F479A</sup> interferes with the interaction  
 409 between ADRI-LI and SNCI, as shown by Co-IP assays in *N. benthamiana*. **d**, *PR1* expression of Col-0  
 410 and *snc1-11* infiltrated with *Pst* DC3000 D36E carrying empty vector, AvrPtoB and AvrPtoB<sup>F173A/F479A</sup>, as  
 411 measured by RT-qPCR. Data represent the mean and standard error of three biological replicates (n = 3  
 412 biologically independent samples, *p*-values from Student's *t*-test). **e**, AvrPtoB activates SNCI-dependent  
 413 resistance to *Pst*. Bacterial growth assays of *Pst* DC3000  $\Delta$ AvrPtoB and *Pst* DC3000  $\Delta$ AvrPtoB  $\Delta$ AvrPtoB on Col-  
 414 0 and *snc1-11* (n = 3 biologically independent samples, *p*-values from Student's *t*-test). **(a-e)** Experiments  
 415 were performed three times, with similar results. **f**, Working model. In absence of functional SNCI, for  
 416 example, in *Ws-2* and *snc1-11*, AvrPtoB ubiquitinates ADRI-LI, and to a lesser extent ADRI-L2, to  
 417 promote their degradation, preventing activation of immunity. In the presence of SNCI, degradation of  
 418 ADRI-LI and ADRI-L2 induced by AvrPtoB activates oligomerization of the guarding NLR SNCI, which  
 419 relays signals through ADRI to trigger downstream immune responses.

## 420 DISCUSSION

421 The conserved helper NLR proteins of the ADRI family are key ETI components<sup>17</sup>. We found  
422 that the bacterial effector AvrPtoB targets ADRI homologs, and that these are in turn guarded  
423 by the sensor NLR SNCI. Our findings demonstrate a new concept in the tug of war between  
424 pathogens using effectors and plants using immune receptors, and they reveal also the long-sought  
425 after function of SNCI in plant immunity.

426 Because NLR over-accumulation can trigger spontaneous autoimmunity, NLR abundance is tightly  
427 controlled at multiple levels<sup>17</sup>. For example, to maintain NLR protein homeostasis, plants evolved  
428 a set of E3 ubiquitin ligases to regulate NLR stability. The plant E3 ligases CPR1/CPR30 and  
429 SNIPER1/2 ubiquitinate SNCI, thereby limiting SNCI levels, and their knockout triggers SNCI-  
430 mediated autoimmunity<sup>37</sup>. Here, we show that *Pseudomonas* utilizes in a similar manner the E3  
431 ligase AvrPtoB effector to induce degradation of the helper NLRs ADRI-L1/2, but in this case  
432 reduced NLR protein levels lead to autoimmunity because ADRI-L1/2 is a client for the sensor  
433 NLR SNCI.

434 AvrPtoB is a conserved effector found in the genomes of diverse Gram-negative bacteria,  
435 including *Pseudomonas*, *Xanthomonas* and *Erwinia*<sup>38</sup>. AvrPtoB has been shown to target and  
436 ubiquitinate a wide range of proteins, including several pattern recognition receptors and PTI key  
437 component BAK1 (BRASSINOSTEROID RECEPTOR-ASSOCIATED KINASE 1)<sup>39</sup>, the master  
438 regulator of salicylic acid signalling, NPR1 (NON-EXRESSER OF PR GENES 1)<sup>40</sup>, and an exocyst  
439 subunit<sup>36</sup>. Here we show that AvrPtoB can dampen both PTI and ETI, by identifying the central  
440 ETI components ADRI-L1 and ADR-L2 as AvrPtoB targets.

441 Pathogen effectors have two roles: One is to manipulate host physiology for the colonizer's  
442 benefit, the other – and the one most recent work has focused on – is to suppress host defences,  
443 especially those related to PTI<sup>41</sup>. PTI and ETI are inter-linked<sup>3-6</sup>, and the targeting of PTI versus  
444 ETI by effectors cannot always be neatly separated. EDS1 was initially identified as a key ETI  
445 component, forming EDS1-PAD4-ADRI and EDS1-SAG101-NRG complexes that regulate  
446 transcriptional reprogramming during defence and HR<sup>42</sup>. The EDS1-PAD4-ADRI module plays,  
447 however, also an important role in PTI<sup>3,6</sup>.

448 Examples of effector targeting NLR come from the *P. infestans* effector AVRcap1b and the cyst  
449 nematode effector SS15, which suppress Solanaceae-specific helper NLRs NRC2 and NRC3  
450 either by affecting their negative regulator NbTOL9a or by preventing their oligomerization and  
451 activation<sup>22,23</sup>. We add to these insights, by revealing not only that helper NLRs ADRI-L1 and  
452 ADRI-L2 are targeted by *P. syringae* effector AvrPtoB, but also that AvrPtoB-induced degradation  
453 of ADRI-L1 and ADRI-L2 is monitored by the sensor NLR SNCI (**Fig. 6f**). Effectors of  
454 independent origin often converge on conserved targets with essential roles in plant immunity<sup>43</sup>.  
455 ADRI homologs, which are widespread in the plant kingdom<sup>7</sup>, clearly fulfil this definition, and it  
456 is therefore not unlikely that other effectors targeting ADRI homologs await discovery. Similarly,  
457 it will be of interest to learn whether ADRI homologs in other species are guarded by NLRs as  
458 well, and whether such interactions mimic the interaction between ADRI-L1/L2 and SNCI in  
459 *Arabidopsis*.

460 One of the reasons that there is a rich literature on SNCI is that its knockout suppresses, albeit  
461 to different degrees, autoimmunity resulting from changes in a wide range of proteins<sup>17</sup>. Given  
462 the role of SNCI as a guard of ADRI homologs, the genetic interactors of SNCI might be  
463 negative regulators of SNCI, potentially by affecting the interaction between SNCI and ADRI  
464 homologs. Guarding of ADRI homologs might, however, not be the only role of SNCI, which  
465 has been proposed to be a more general amplifier of ETI<sup>44</sup>. SNCI was found to enhance avrRpt2-  
466 and avrRps4- induced resistance<sup>44</sup>, which depends on ADRI homologs<sup>45</sup>. We propose that the  
467 formation of ADRI oligomers triggered by interaction of effectors such as AvrRpt2 and AvrRps4  
468 with their cognate NLR immune receptors could displace SNCI from the ADRI-L1/2-SNCI  
469 guardee-guard complex, which in turn might amplify downstream immune responses via ADRI.  
470 Regardless of any other roles, however, SNCI clearly fits the definition of a resistance protein  
471 for indirect recognition of the bacterial effector AvrPtoB. The importance of being able to detect  
472 AvrPtoB is also apparent from the fact that, as with other effectors<sup>17</sup>, AvrPtoB can be recognized  
473 by other NLRs, including tomato Prf via its guardee Pto, which directly interacts with AvrPtoB<sup>46,47</sup>.

474 In summary, we have demonstrated that bacterial AvrPtoB ubiquitinates conserved key  
475 components of ETI, which in turn is detected by the plant host through the sensor NLR SNCI.  
476 Our work highlights how the same pathway can be a target of pathogen effector proteins and at  
477 the same time be used to protect the host from these effectors. In addition, we demonstrate

478 how sequence diversification enables a partially redundant helper NLR to evade effector  
479 suppression and thereby preserve the integrity of ETI.

## 480 REFERENCES

- 481 1. Jones, J. D. G. & Dangl, J. L. The plant immune system. *Nature* **444**, 323–329 (2006).
- 482 2. Zhou, J.-M. & Zhang, Y. Plant Immunity: Danger Perception and Signaling. *Cell* **181**, 978–989  
483 (2020).
- 484 3. Pruitt, R. N. *et al.* The EDSI–PAD4–ADRI node mediates Arabidopsis pattern-triggered  
485 immunity. *Nature* 1–5 (2021).
- 486 4. Yuan, M. *et al.* Pattern-recognition receptors are required for NLR-mediated plant immunity.  
487 *Nature* **592**, 105–109 (2021).
- 488 5. Ngou, B. P. M., Ahn, H.-K., Ding, P. & Jones, J. D. G. Mutual potentiation of plant immunity  
489 by cell-surface and intracellular receptors. *Nature* **592**, 110–115 (2021).
- 490 6. Tian, H. *et al.* Activation of TIR signalling boosts pattern-triggered immunity. *Nature* **598**,  
491 500–503 (2021).
- 492 7. Liu, Y. *et al.* An angiosperm NLR atlas reveals that NLR gene reduction is associated with  
493 ecological specialization and signal transduction component deletion. *Mol. Plant* **14**, 2015–  
494 2031 (2021).
- 495 8. Bi, G. *et al.* The ZARI resistosome is a calcium-permeable channel triggering plant immune  
496 signaling. *Cell* **184**, 3528–3541.e12 (2021).
- 497 9. Förderer, A. *et al.* A wheat resistosome defines common principles of immune receptor  
498 channels. *Nature* **610**, 532–539 (2022).
- 499 10. Jacob, P. *et al.* Plant ‘helper’ immune receptors are Ca<sup>2+</sup>-permeable nonselective cation  
500 channels. *Science* **373**, 420–425 (2021).
- 501 11. Huang, S. *et al.* Identification and receptor mechanism of TIR-catalyzed small molecules in  
502 plant immunity. *Science* **377**, eabq3297 (2022).
- 503 12. Wu, Z. *et al.* Differential regulation of TNL-mediated immune signaling by redundant helper  
504 CNLs. *New Phytol.* **222**, 938–953 (2019).
- 505 13. Castel, B. *et al.* Diverse NLR immune receptors activate defence via the RPW8-NLR NRG1.  
506 *New Phytol.* **222**, 966–980 (2019).
- 507 14. Zhang, Y., Goritschnig, S., Dong, X. & Li, X. A gain-of-function mutation in a plant disease  
508 resistance gene leads to constitutive activation of downstream signal transduction pathways  
509 in suppressor of npr1-1, constitutive 1. *Plant Cell* **15**, 2636–2646 (2003).
- 510 15. Stokes, T. L., Kunkel, B. N. & Richards, E. J. Epigenetic variation in Arabidopsis disease  
511 resistance. *Genes Dev.* **16**, 171–182 (2002).
- 512 16. Li, X., Clarke, J. D., Zhang, Y. & Dong, X. Activation of an EDSI-mediated R-gene pathway  
513 in the sncl mutant leads to constitutive, NPR1-independent pathogen resistance. *Mol. Plant.*  
514 *Microbe. Interact.* **14**, 1131–1139 (2001).
- 515 17. van Wersch, S., Tian, L., Hoy, R. & Li, X. Plant NLRs: The Whistleblowers of Plant Immunity.  
516 *Plant Commun* **1**, 100016 (2020).
- 517 18. Zhu, W. *et al.* Modulation of ACD6 dependent hyperimmunity by natural alleles of an  
518 Arabidopsis thaliana NLR resistance gene. *PLoS Genet.* **14**, e1007628 (2018).
- 519 19. Wei, H.-L. *et al.* Pseudomonas syringae pv. tomato DC3000 Type III Secretion Effector

- 520 Polymutants Reveal an Interplay between HopAD1 and AvrPtoB. *Cell Host Microbe* **17**, 752–  
521 762 (2015).
- 522 20. Martel, A. *et al.* Metaeffector interactions modulate the type III effector-triggered immunity  
523 load of *Pseudomonas syringae*. *PLoS Pathog.* **18**, e1010541 (2022).
- 524 21. Wei, H.-L., Zhang, W. & Collmer, A. Modular Study of the Type III Effector Repertoire in  
525 *Pseudomonas syringae* pv. tomato DC3000 Reveals a Matrix of Effector Interplay in  
526 Pathogenesis. *Cell Rep.* **23**, 1630–1638 (2018).
- 527 22. Derevnina, L. *et al.* Plant pathogens convergently evolved to counteract redundant nodes of  
528 an NLR immune receptor network. *PLoS Biol.* **19**, e3001136 (2021).
- 529 23. Contreras, M. P. *et al.* Resurrection of plant disease resistance proteins via helper NLR  
530 bioengineering. *bioRxiv* 2022.12.11.519957 (2022) doi:10.1101/2022.12.11.519957.
- 531 24. Janjusevic, R., Abramovitch, R. B., Martin, G. B. & Stebbins, C. E. A bacterial inhibitor of host  
532 programmed cell death defenses is an E3 ubiquitin ligase. *Science* **311**, 222–226 (2006).
- 533 25. Collier, S. M., Hamel, L.-P. & Moffett, P. Cell death mediated by the N-terminal domains of  
534 a unique and highly conserved class of NB-LRR protein. *Mol. Plant. Microbe. Interact.* **24**, 918–  
535 931 (2011).
- 536 26. Bonardi, V. *et al.* Expanded functions for a family of plant intracellular immune receptors  
537 beyond specific recognition of pathogen effectors. *Proc. Natl. Acad. Sci. U. S. A.* **108**, 16463–  
538 16468 (2011).
- 539 27. Dong, O. X. *et al.* TNL-mediated immunity in *Arabidopsis* requires complex regulation of  
540 the redundant ADRI gene family. *New Phytol.* **210**, 960–973 (2016).
- 541 28. van Wersch, R., Li, X. & Zhang, Y. Mighty Dwarfs: *Arabidopsis* Autoimmune Mutants and  
542 Their Usages in Genetic Dissection of Plant Immunity. *Front. Plant Sci.* **7**, 1717 (2016).
- 543 29. Cui, H. *et al.* A core function of EDS1 with PAD4 is to protect the salicylic acid defense  
544 sector in *Arabidopsis* immunity. *New Phytol.* **213**, 1802–1817 (2017).
- 545 30. Van de Weyer, A.-L. *et al.* A Species-Wide Inventory of NLR Genes and Alleles in  
546 *Arabidopsis thaliana*. *Cell* **178**, 1260–1272.e14 (2019).
- 547 31. Yang, S. & Hua, J. A haplotype-specific Resistance gene regulated by BONZAI1 mediates  
548 temperature-dependent growth control in *Arabidopsis*. *Plant Cell* **16**, 1060–1071 (2004).
- 549 32. Wang, J. *et al.* Reconstitution and structure of a plant NLR resistosome conferring immunity.  
550 *Science* **364**, eaav5870 (2019).
- 551 33. Wang, J. *et al.* Ligand-triggered allosteric ADP release primes a plant NLR complex. *Science*  
552 **364**, eaav5868 (2019).
- 553 34. Martin, R. *et al.* Structure of the activated ROQ1 resistosome directly recognizing the  
554 pathogen effector XopQ. *Science* **370**, (2020).
- 555 35. Ma, S. *et al.* Direct pathogen-induced assembly of an NLR immune receptor complex to form  
556 a holoenzyme. *Science* **370**, (2020).
- 557 36. Wang, W., Liu, N., Gao, C., Rui, L. & Tang, D. The *Pseudomonas Syringae* Effector AvrPtoB  
558 Associates With and Ubiquitinates *Arabidopsis* Exocyst Subunit EXO70B1. *Front. Plant Sci.*  
559 **10**, 1027 (2019).
- 560 37. Lapin, D., Johannrees, O., Wu, Z., Li, X. & Parker, J. E. Molecular innovations in plant TIR-  
561 based immunity signaling. *Plant Cell* **34**: 1479–1496 (2022).
- 562 38. Abramovitch, R. B., Kim, Y.-J., Chen, S., Dickman, M. B. & Martin, G. B. *Pseudomonas* type  
563 III effector AvrPtoB induces plant disease susceptibility by inhibition of host programmed  
564 cell death. *EMBO J.* **22**, 60–69 (2003).
- 565 39. Wei, H.-L. & Collmer, A. Defining essential processes in plant pathogenesis with



- 566 Pseudomonas syringae pv. tomato DC3000 disarmed polymutants and a subset of key type  
567 III effectors. *Mol. Plant Pathol.* **19**, 1779–1794 (2018).
- 568 40. Chen, H. *et al.* A Bacterial Type III Effector Targets the Master Regulator of Salicylic Acid  
569 Signaling, NPR1, to Subvert Plant Immunity. *Cell Host Microbe* **22**, 777–788.e7 (2017).
- 570 41. Deslandes, L. & Rivas, S. Catch me if you can: bacterial effectors and plant targets. *Trends*  
571 *Plant Sci.* **17**, 644–655 (2012).
- 572 42. Sun, X. *et al.* Pathogen effector recognition-dependent association of NRG1 with EDS1 and  
573 SAG101 in TNL receptor immunity. *Nat. Commun.* **12**, 3335 (2021).
- 574 43. Weßling, R. *et al.* Convergent targeting of a common host protein-network by pathogen  
575 effectors from three kingdoms of life. *Cell Host Microbe* **16**, 364–375 (2014).
- 576 44. Wang, Z., Yang, L. & Hua, J. The intracellular immune receptor like gene SNCI is an  
577 enhancer of effector-triggered immunity in Arabidopsis. *Plant Physiol.* **191**, 874–884 (2022).
- 578 45. Saile, S. C. *et al.* Two unequally redundant ‘helper’ immune receptor families mediate  
579 Arabidopsis thaliana intracellular ‘sensor’ immune receptor functions. *PLoS Biol.* **18**,  
580 e3000783 (2020).
- 581 46. Mucyn, T. S. *et al.* The tomato NBARC-LRR protein Prf interacts with Pto kinase in vivo to  
582 regulate specific plant immunity. *Plant Cell* **18**, 2792–2806 (2006).
- 583 47. Mathieu, J., Schwizer, S. & Martin, G. B. Pto kinase binds two domains of AvrPtoB and its  
584 proximity to the effector E3 ligase determines if it evades degradation and activates plant  
585 immunity. *PLoS Pathog.* **10**, e1004227 (2014).

## 586 **METHODS**

587 **Plant material and growth conditions** *Arabidopsis thaliana* and *Nicotiana benthamiana* were  
588 derived from stocks maintained in the lab. *Arabidopsis* mutants and transgenic plants generated  
589 in this study are listed in the key resource table. *Arabidopsis* plants were grown under long-day  
590 (16 h day/8 h night) or short-day (10 h day/14 h night) regimes at 23°C with relative humidity at  
591 65%. *Nicotiana benthamiana* plants were grown in a greenhouse under long-day conditions for 4-  
592 5 weeks before transient transformation.

593 **Cell death assays.** For the cell death assays, autoactive variants of ADRI were co-expressed  
594 with indicated genes in *N. benthamiana* through agroinfiltration. Briefly, *Agrobacterium tumefaciens*  
595 GV3101 containing the relevant expression vectors were grown in liquid LB (Lysogeny broth)  
596 medium overnight in a shaking incubator (220 rpm, 28°C). *Agrobacteria* were precipitated through  
597 centrifugation and re-suspended in an infiltration buffer (10 mM MgCl<sub>2</sub>, 10 mM MES, pH 5.6).  
598 Vectors used for cell death assays are listed in **Supplementary Table I**. For co-expression,  
599 each bacterial suspension was adjusted to the final OD<sub>600</sub> indicated in **Supplementary Table**  
600 **I**, and infiltrated into 4-week-old *N. benthamiana* plants. The HR phenotypes were photographed  
601 and scored 2-3 days after agroinfiltration.

602 **Generation of transgene-free gene-edited lines.** The gRNA sequences, gRNA1 5'-  
603 GAGCTCCATTGACTTGACT-3', gRNA2 5'-CTATAACGTTAACCGGTAG-3', and gRNA3 5'-  
604 GCTCACCGCCAAGCTCAAAT-3' were introduced to pREE40IE, which was modified from an  
605 egg cell-specific CRISPR-CAS9 toolkit vector pHEE40IE by adding Fast-RED selection marker<sup>48,49</sup>,  
606 to knock-out *ADRI-L1*. The gene editing events were verified by PCR and Sanger sequencing. T<sub>2</sub>  
607 seeds that without red fluorescent seed coats were isolated as transgene-free seeds.

608 **Generation of high-order mutants.** To generate high-order mutants, *adr1-L1-cl* was crossed  
609 with *pad4-1*, *sid2-2*, *ndr1-1*, *eds1-2*, *nrg* triple, *adr1* triple. The homozygous high-order mutants  
610 were verified by PCR or Sanger sequencing. The genotyping primers are listed in  
611 **Supplementary Table 2**.

612 **RT-qPCR.** RNA was extracted from plant tissue using an RNA isolation method (R401, Vazyme  
613 Biotech Co. Ltd. Nanjing, China). cDNA was synthesized from 0.5 µg high-quality total RNA



614 (A260/A230>2.0 and A260/A280>1.8), using HiScript III First Strand cDNA Synthesis (R312,  
615 Vazyme Biotech Co. Ltd. Nanjing, China). SYBR master mix (Q711, Vazyme Biotech Co. Ltd.,  
616 Nanjing, China) was used for quantitative real-time PCR in a Thermo Fisher system (ABI  
617 QuantStudio 6 Flex) according to the manufacturer's instructions. The comparative Ct ( $\Delta\Delta C_t$ )  
618 method was used to calculate the relative expression of genes of interest, using *ACTIN2* gene  
619 (*AT3G18780*) as an internal control. The primers used for qPCR are listed in **Supplementary**  
620 **Table 2**.

621 **Phylogeny analysis.** To construct the phylogenetic tree of ADRI homologs in angiosperms,  
622 the amino acid sequence of  $CC_R^{ADRI-L1}$  was used as query to BLAST in NCBI. The resulted  
623 sequences, which feature typical  $CC_R$ , NB-ARC, and LRR domains, were used for further analysis.  
624 The MAFFT aligned sequences of the NB-ARC domain were used for phylogeny analysis with  
625 PhyML in NGPhylogeny.fr webserver<sup>50</sup>. Sequence LOGOs of ADRI, ADRI-L1, and ADRI-L2 in  
626 Brassicaceae were created by WebLOGO webserver<sup>51</sup> with grouped sequences according to  
627 phylogeny analysis results.

628 **Constructs and transgenic lines.** The genomic fragments of *ADRI*, *ADRI-L1*, and *ADRI-L2*  
629 were amplified through PCR using Col-0 genomic DNA as template. The resulting PCR products  
630 were cloned into entry vector pUC19 using homologous recombination (CI15, Vazyme Biotech  
631 Co. Ltd. Nanjing, China) and transferred into the binary vector pCambia1300, which contains  
632 hygromycin marker for plant selection. To generate *pT-DNA::ADRI-L1 $\Delta^{12aa}$*  and *p35S::ADRI-L1 $\Delta^{12aa}$* ,  
633 the truncated *ADRI-L1 $\Delta^{12aa}$*  CDS fragment was amplified from cDNA of SAIL\_302\_C06, and a 2  
634 kb of T-DNA fragment near to insertion site and 35S *CaMV* fragment were amplified as  
635 promoters for *ADRI-L1 $\Delta^{12aa}$* . The corresponding promoter and the *ADRI-L1 $\Delta^{12aa}$*  amplicon were  
636 cloned into pCambia1300 by multiple fragments homologous recombination. The CDS of  $CC_R^{ADRI/s}$   
637 were amplified from Col-0 cDNA, cloned into the entry vector pUC19, and then subcloned into  
638 the binary vector pCBNS-GFP. The CDS of AvrPtoB was amplified using *Pst* DC3000 genomic  
639 DNA and cloned into pCBCS-HA-FLAG and pME6012 by homologous recombination.  
640 Site-directed mutagenesis and chimeric constructs were carried out by introducing  
641 corresponding changes in the primers using multiple fragments homologous recombination.

642 Primer sequences used for domain swap and site-directed mutagenesis were listed in  
643 **Supplementary Table 2.**

644 The expression constructs were introduced into *Agrobacterium tumefaciens* GV3101 by  
645 electroporation. Stable transgenic plants were generated through the floral dipping method<sup>52</sup>. T<sub>1</sub>  
646 transformants were screened based on hygromycin selection or red fluorescent selection.

647 **Map-based cloning.** To map the natural suppressor(s) of *adr1-L1* in Ws-2, a F<sub>2</sub> mapping  
648 population derived from a cross between *adr1-L1*<sup>Ws-2</sup> and *adr1-L1-cl* was generated. F<sub>2</sub> individuals  
649 with normal growth phenotypes were selected for genotyping. The SSLP markers were designed  
650 according to Yang's previous work<sup>31</sup>, and the detailed information is provided in  
651 **Supplementary Table 2.**

652 **Bacterial infection.** For the bacterial infection assays on soil-grown plants, *Pst* DC3000 was  
653 precipitated by centrifugation and suspended in 10mM MgCl<sub>2</sub> solution. The concentrations of *Pst*  
654 DC3000 were adjusted to OD<sub>600</sub> = 0.002. *Pst* DC3000 was infiltrated into rosette leaves with a  
655 needleless syringe. Leaf discs (6 mm) from inoculated leaves were collected at 3 dpi.

656 For the bacterial infection assays on germ-free plants, seedlings were grown on 1/2 Murashige  
657 and Skoog (MS) medium in 90 × 90 mm culture plate for three weeks. Bacteria were grown  
658 overnight at 28°C in the King's B medium plates with appropriate antibiotics. Bacteria were  
659 harvested from the plates, resuspended in sterile water with 0.025% Silwet L-77, and the  
660 concentration of *Pst* DC3000  $\Delta$ *AvrPto* and *Pst* DC3000  $\Delta$ *AvrPto*  $\Delta$ *AvrPtoB* were adjusted to an  
661 optical density at OD<sub>600</sub> = 0.02. 50 ml of bacterial suspension was poured onto the culture plates  
662 containing 3-week-old plant and rested for 3 min at room temperature. After removing the  
663 bacterial suspension by decantation, the plates were sealed with 3M Micropore surgical tape and  
664 incubated at the growth chamber. The whole plant was weighed and collected at 2 dpi.

665 **AvrPtoB-induced protein degradation in Arabidopsis.** For the protein degradation assays,  
666 Arabidopsis plants were grown under short-day conditions. *Pseudomonas syringae* DC3000 D36E  
667 strains containing *EV*, *AvrPtoB*, or *AvrPtoB*<sup>F173A/F479A</sup>, were cultured on solid KB (King's B) medium  
668 at 28°C for 24 hours. Bacterial suspensions were adjusted to an OD<sub>600</sub> of 0.4 in 10 mM MgCl<sub>2</sub>  
669 solution, then infiltrated into 4-week-old Arabidopsis plants with a needleless syringe. Leaf discs

670 at a diameter of 6 mm were collected from inoculated leaves at 0 hpi, 3 hpi, 6 hpi, and 12 hpi for  
671 immunoblots.

672 **Split-luciferase complementation assay.** In the Split-Luc assays, AvrPtoB-nLuc was  
673 transiently co-expressed with ADRI-cLuc, ADRI-L1-cLuc, ADRI-L2-cLuc, and EV in 4-week-old  
674 *N. benthamiana* leaves. At 2 days post-infiltration (dpi) with *Agrobacterium* strains harbouring the  
675 relevant constructs, leaves were infiltrated with 1 mM luciferin containing 0.02% Silwet L-77 and  
676 kept in the dark for 5 minutes before CCD imaging. To quantify the luciferase signal, leaf discs  
677 were collected from the inoculated leaves using a 6 mm puncher and placed into a 96-well plate  
678 with 60  $\mu$ l H<sub>2</sub>O. 60  $\mu$ l of 2 mM luciferin was added to the leaf discs in the 96-well plate before  
679 recording luminescence.

680 **Co-immunoprecipitation.** *Agrobacterium* strains harbouring AvrPtoB-HA, SNCI-H, ADRI-  
681 FLAG, ADRI-L1-FLAG, and ADRI-L2-FLAG were grown overnight in LB medium containing  
682 appropriate antibiotics (220 rpm, 28°C) and used for agroinfiltration in *N. benthamiana*. Inoculated  
683 leaves were harvested 2dpi and ground into powder with liquid nitrogen. Ground tissues were  
684 homogenized in ice-cold extraction buffer (10% glycerol, 25 mM Tris-HCl pH 7.5, 1 mM EDTA,  
685 150 mM NaCl, 2% PVP, 0.5% Triton-X100) supplemented with 1 mM DTT, anti-protease tablet  
686 (04693132001, Roche, USA). The resulting lysate was homogenized by mixing for 20 min on ice  
687 and centrifuged at 13000 rpm for 15 min at 4°C, with this step being repeated twice. The  
688 supernatant was incubated with 5  $\mu$ l Antibodies-coupled beads (Anti-FLAG M2, M8823, Sigma-  
689 Aldrich, USA; Anti-GFP, KTSM1334, KangTi Life Technology, Shenzhen, China) for 3 hours at  
690 4°C under gentle agitation. After incubation, beads were washed six times with washing buffer  
691 (25 mM Tris-HCl pH 7.5, 1 mM EDTA, 150 mM NaCl, 0.5% Triton-X 100, 1 mM DTT) at 4°C.  
692 SDS-loading buffer (8 M urea, 2% SDS, 20% glycerol, 100 mM Tris-HCl pH 6.8, 0.004%  
693 bromophenol blue) with 100 mM DTT was added to beads before boiling at 95°C for 5 min to  
694 release bound proteins. Released proteins were analysed by immunoblots.

695 **In vitro ubiquitination assays.** Bacteria (BL21) harbouring GST-, MBP-6xHis-, and 6xHis-  
696 fusion protein expression vectors were cultured in LB at 37°C until an OD<sub>600</sub> of 0.6. Protein  
697 expression was induced by adding 0.4 mM IPTG and incubating at 16°C for 16 hours. Tagged

698 proteins were purified separately using Glutathione Sepharose 4B (17075601, GE Healthcare,  
699 Chicago, USA) or Ni-NTA affinity agarose beads (30210, QIAGEN, Venlo, Netherlands).

700 Ubiquitination reactions were performed in a total volume of 30  $\mu$ l, consisting of 50 mM Tris-  
701 HCl (pH 7.5), 2 mM ATP, 1 mM  $MgCl_2$ , 1 mM DTT, 500 mg EI-His, 1  $\mu$ g E2-His, 3  $\mu$ g GST-  
702 AvrPtoB, 500ng MBP-CC<sub>RS</sub> and 3  $\mu$ g ubiquitin for 8 h at 30 °C. Reactions were stopped by adding  
703 30  $\mu$ l SDS-loading buffer (8 M urea, 2% SDS, 20% glycerol, 100 mM Tris-HCl pH 6.8, 0.004%  
704 bromophenol blue) and the samples were boiled for 5 min at 95°C.

705 **In vitro pull-down assays.** For the GST pull-down assays, 2  $\mu$ g GST-tagged Protein, 20  $\mu$ l  
706 Glutathione Sepharose 4B (17075601, GE Healthcare, Chicago, USA) and 10  $\mu$ g MBP-6xHis-  
707 tagged protein were added to 1 ml pull-down buffer (50 mM Tris-HCl [pH 7.5], 200 mM NaCl,  
708 0.5% [v/v] Triton X-100) and incubated for 4 hours under gentle rotation. Beads were washed 6  
709 times with 1 ml pull-down buffer. SDS-loading buffers were added to beads before boiling to  
710 release bound proteins. The released proteins were analysed by immunoblots using anti-  
711 Glutathione-S-Transferase (AE001, AbClonal, Wuhan, China) and anti-MBP (AE016, AbClonal,  
712 Wuhan, China) antibodies.

713 For the SNCI-GFP pull-down assays, ground *N. benthamiana* leaves transiently expressing SNCI-  
714 GFP were homogenized in extraction buffer containing 10% glycerol, 25 mM Tris-HCl pH 7.5, 1  
715 mM EDTA, 150 mM NaCl, 2% PVP, 0.5% Triton-X 100, 1 mM DTT, and protease inhibitor. The  
716 resulting lysate was centrifuged and subjected for SNCI-GFP precipitation using anti-GFP  
717 magnetic beads (KTSM1334, KangTi Life Technology, Shenzhen, China). The anti-GFP magnetic  
718 beads were then aliquoted into 4 tubes containing 2  $\mu$ g MBP-tagged protein in 1 ml buffer  
719 containing 25 mM Tris-HCl pH 7.5, 1 mM EDTA, 150 mM NaCl, and 0.5% Triton-X100, and  
720 incubated for 3 hours under gentle rotation. Beads are washed 6 times with 1 ml pull-down buffer.  
721 SDS-loading buffers were added to beads before boiling to release bound proteins. The released  
722 proteins were analysed by immunoblots using anti-GFP (AE012, AbClonal, Wuhan, China) and  
723 anti-MBP (AE016, AbClonal, Wuhan, China) antibodies.

724 **Blue Native-PAGE.** Blue native polyacrylamide gel electrophoresis (BN-PAGE) was performed  
725 according to ref. 53. Three 14-day-old seedlings, infected with or without *Pst* D36E, were  
726 collected and homogenized in 1 x NativePAGE Sample Buffer (BN20032, Invitrogen, CA, USA)

727 supplemented with 1% n-dodecyl  $\beta$ -D-maltoside (DDM) and protease inhibitor cocktail  
728 (4693116001, Roche, USA). Homogenization was achieved by gently mixing on ice for 20 min,  
729 followed by 20000 g centrifugation for 15 min at 4°C. The resulting supernatant was mixed with  
730 0.25% G-250 Sample Additive and loaded on a NativePAGE 3-12% Bis-Tris gel (BN1001BOX,  
731 Invitrogen, CA, USA) for electrophoresis.

732 **Data availability.** This study analyses existing, publicly available sequencing data and does not  
733 disclose new datasets and sequences. All data are provided in the main figures and extended data.

## 734 REFERENCES

- 735 48. Shimada, T. L., Shimada, T. & Hara-Nishimura, I. A rapid and non-destructive screenable  
736 marker, FAST, for identifying transformed seeds of *Arabidopsis thaliana*. *Plant J.* **61**, 519–528  
737 (2010).
- 738 49. Wang, Z.-P. *et al.* Egg cell-specific promoter-controlled CRISPR/Cas9 efficiently generates  
739 homozygous mutants for multiple target genes in *Arabidopsis* in a single generation. *Genome*  
740 *Biol.* **16**, 144 (2015).
- 741 50. Lemoine, F. *et al.* NGPhylogeny.fr: new generation phylogenetic services for non-specialists.  
742 *Nucleic Acids Res.* **47**, W260–W265 (2019).
- 743 51. Crooks, G. E., Hon, G., Chandonia, J.-M. & Brenner, S. E. WebLogo: a sequence logo  
744 generator. *Genome Res.* **14**, 1188–1190 (2004).
- 745 52. Clough, S. J. & Bent, A. F. Floral dip: a simplified method for *Agrobacterium*-mediated  
746 transformation of *Arabidopsis thaliana*. *Plant J.* **16**, 735–743 (1998).
- 747 53. Na Ayutthaya, P. P., Lundberg, D., Weigel, D. & Li, L. Blue Native Polyacrylamide Gel  
748 Electrophoresis (BN-PAGE) for the Analysis of Protein Oligomers in Plants. *Curr. Protoc. Plant*  
749 *Biol.* **5**, e20107 (2020).

## 750 ACKNOWLEDGEMENTS

751 We thank Lei Li (CAS), Guozhi Bi (CAU), Yule Liu (THU) for discussion. We thank Wenbo Ma  
752 (TSL) for critical reading of the manuscript. We thank Lei Li and He Zhao (TSL) for technical  
753 support with the BN-PAGE experiment. We thank Xin Li (UBC) for helper-NLR mutant seeds,  
754 Hailei Wei (CAAS) for the *Pst* DC3000 D36E strain, Jun Liu (CAU) for the *Pst* DC3000 T3SS  
755 effector vector library and the DC3000  $\Delta$ *AvrPto* strain, and Fuhao Cui (CAU) for the *Pst* DC3000  
756  $\Delta$ *AvrPto*  $\Delta$ *AvrPtoB* strain. R.W. was supported by the EU Horizon 2020 research and innovation  
757 programme under the Marie Skłodowska-Curie scheme (H2020-MSCA-IF-2014-655295). J.D.J.  
758 was supported by the Gatsby Foundation (UK). D.W. was supported by the Max Planck Society.

759 J.H. was supported by the EUs Horizon 2020 research and innovation programme under the  
760 Marie Skłodowska-Curie scheme (No 897584). W.Z. was supported by the National Key  
761 Research and Development Program, Ministry of Science and Technology of China (No  
762 2022YFD1201802), the Ministry of Education of China (the III Project B13006) and the 2115  
763 Talent Development Program of China Agricultural University (No 2020RC013).

## 764 **AUTHOR CONTRIBUTIONS**

765 Conceptualization: J.H., W.Z. Methodology: M.W., J.C., R.W., H.G., H.G., J.H., W.Z. Formal  
766 analysis: M.W., J.C., R.W., W.Z. Investigation: M.W., J.C., R.W., H.G., Y.C., Z.L., L.W., C.L., S.H.,  
767 M.D., H.G. Writing—original draft: M.W., J.C., J.H., W.Z. Writing—review, and editing: J.C., J.H.,  
768 W.Z., D.W. Supervision: Y.P., D.W., J.D.J., W.Z. Project administration: W.Z. Funding acquisition:  
769 R.W., J.D.J., D.W., J.H., W.Z.

## 770 **COMPETING FINANCIAL INTERESTS**

771 D.W. holds equity in Computomics, which advises plant breeders. D.W. consults for KWS SE, a  
772 plant breeder and seed producer with activities throughout the world. The other authors declare  
773 no competing interests.
